# Supplementary material for: Hidden Diversity in an Antarctic Algal Forest: Metabolomic Profiling Linked to Patterns of Genetic Diversification in the Antarctic Red Alga Plocamium sp
Source: MDPI journal article supplement (doi:10.3390/md19110607), 2021-10-27
Supplement: s1 [file s1]

# Hidden Diversity in an Antarctic Algal Forest: Metabolomic Profiling Linked to Patterns of Genetic Diversification in the Antarctic Red Alga *Plocamium* sp.

Andrew J. Shilling<sup>1</sup>, Sabrina Heiser<sup>2</sup>, Charles D. Amsler<sup>2\*</sup>, James B. McClintock<sup>2</sup>, and Bill J. Baker<sup>1\*</sup>

<sup>1</sup> Department of Chemistry, University of South Florida, 4202 E. Fowler Ave., Tampa, FL 33620, USA;  
andrewjshilling@yahoo.com (A.J.S.)

<sup>2</sup> Department of Biology, University of Alabama at Birmingham, 1300 University Blvd., Birmingham, AL 35233-  
1405, USA; heiser@uab.edu (S.H.); mcclinto@uab.edu (J.B.M.)

\* Correspondence: amsler@uab.edu (C.D.A.); bjbaker@usf.edu (B.J.B)

|                                                                                       |   |
|---------------------------------------------------------------------------------------|---|
| <b>Figure S1.</b> <i>Plocamium</i> sp. collection sites near Palmer Station.....      | 2 |
| <b>Figure S2.</b> GC/MS (NCI) identification of major components of chemogroup A..... | 3 |
| <b>Figure S3.</b> GC/MS (NCI) identification of major components of chemogroup D..... | 3 |
| <b>Figure S4.</b> GC/MS (NCI) identification of major components of chemogroup H..... | 4 |
| <b>Figure S5.</b> GC/MS (NCI) identification of major components of chemogroup L..... | 4 |

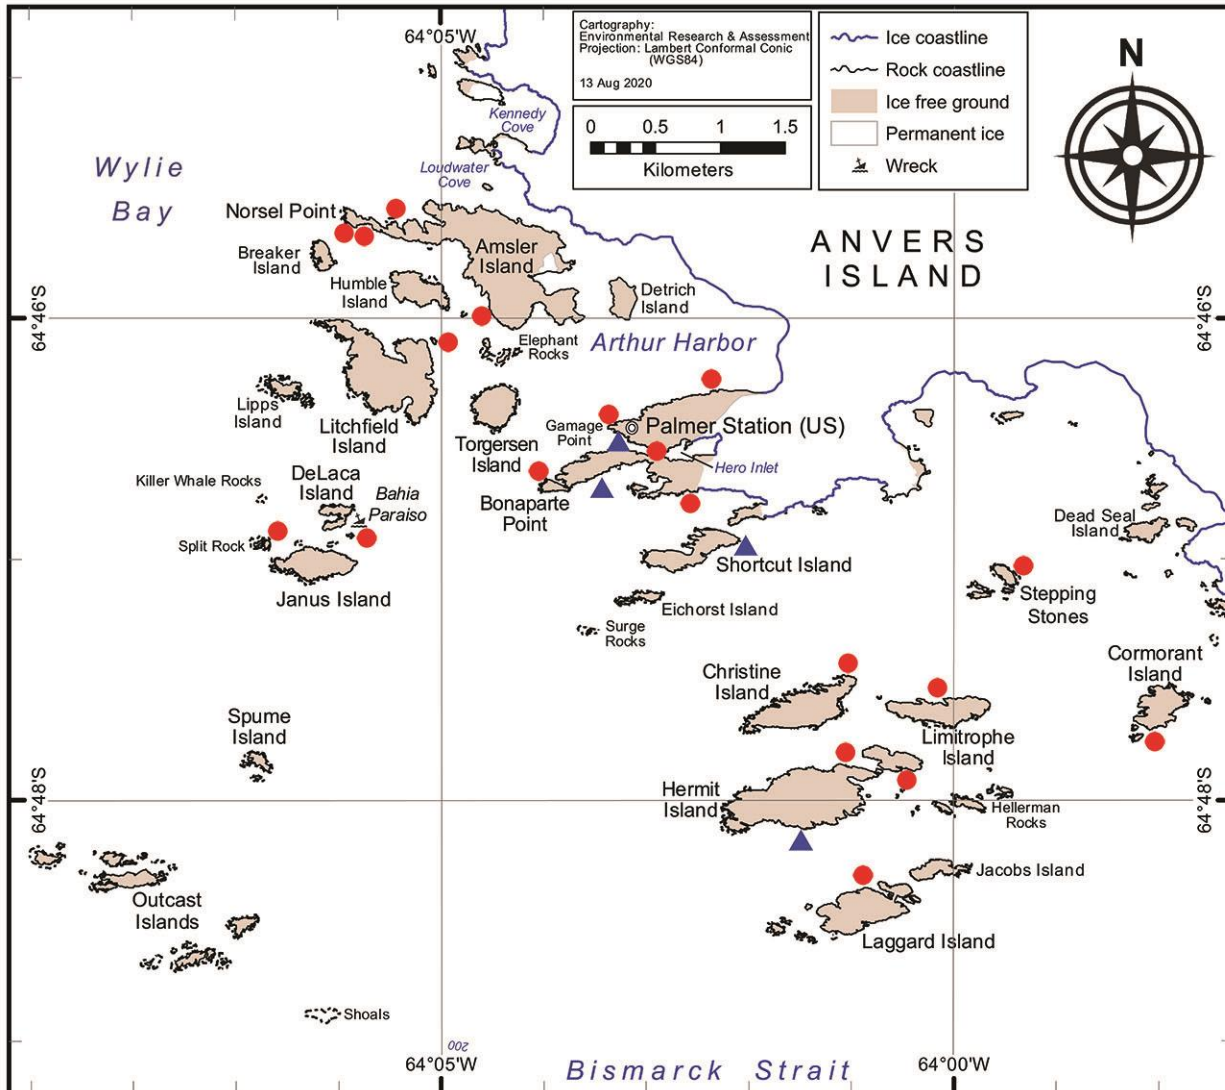

**Figure S1.** *Plocamium* sp. collection sites near Palmer Station, Antarctica. Red circles indicate collection sites from 2016, most of which were resampled in 2017 and/or 2018. Blue triangles indicate additional collection sites from 2017 and 2018.

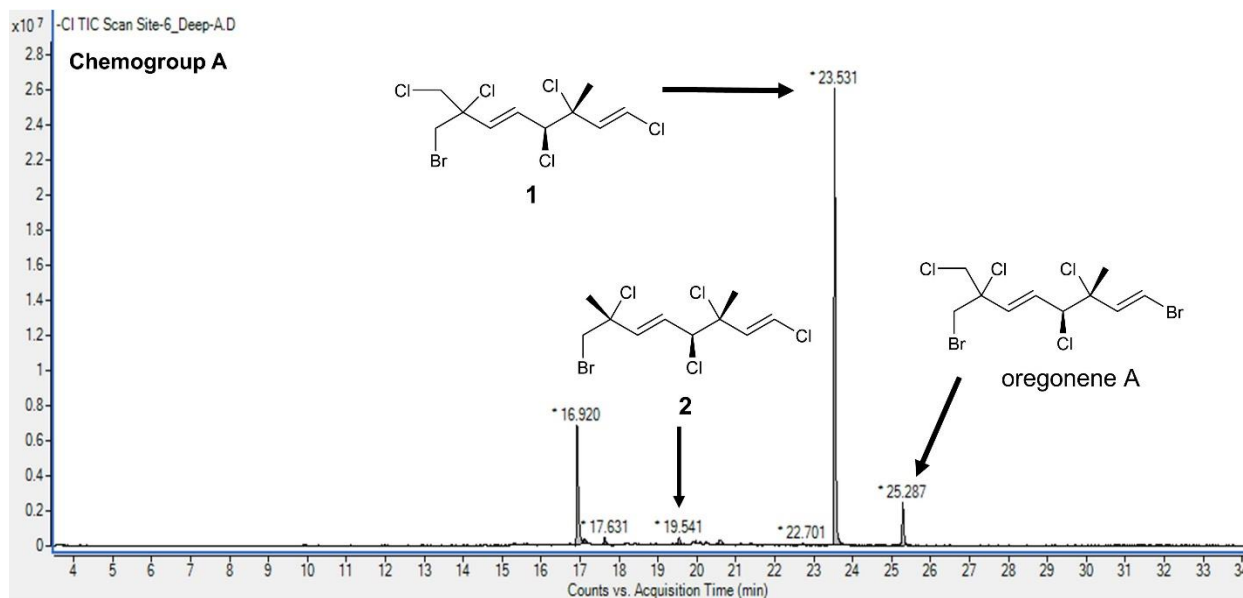

**Figure S2.** GC/MS (NCI) identification of major components of chemogroup A.

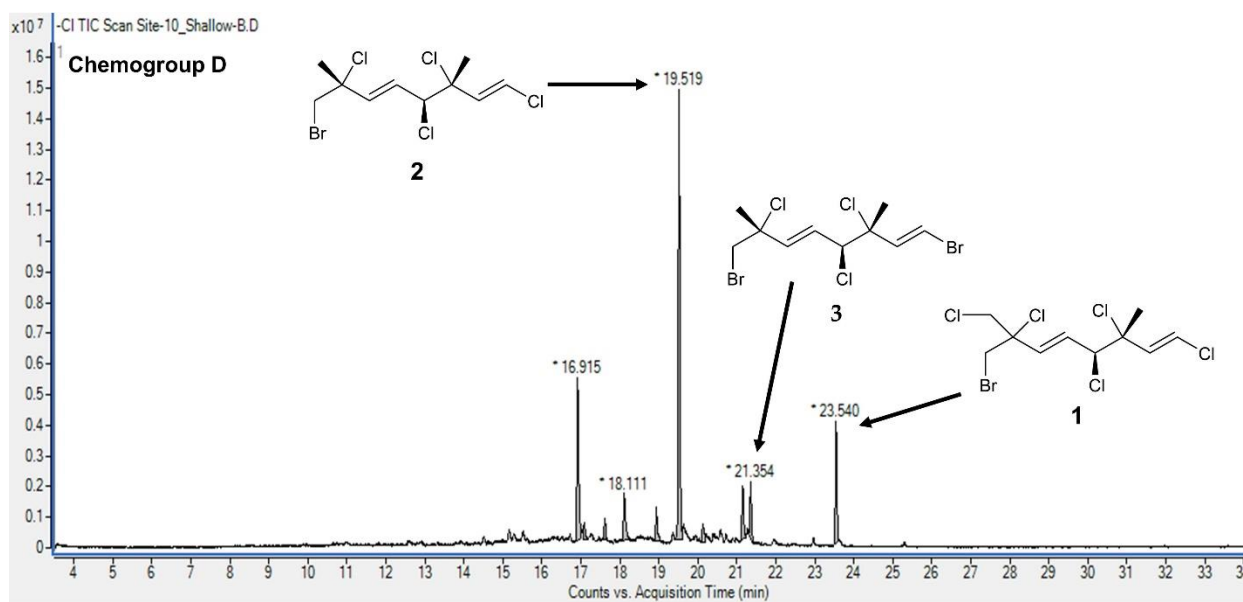

**Figure S3.** GC/MS (NCI) identification of major components of chemogroup D.

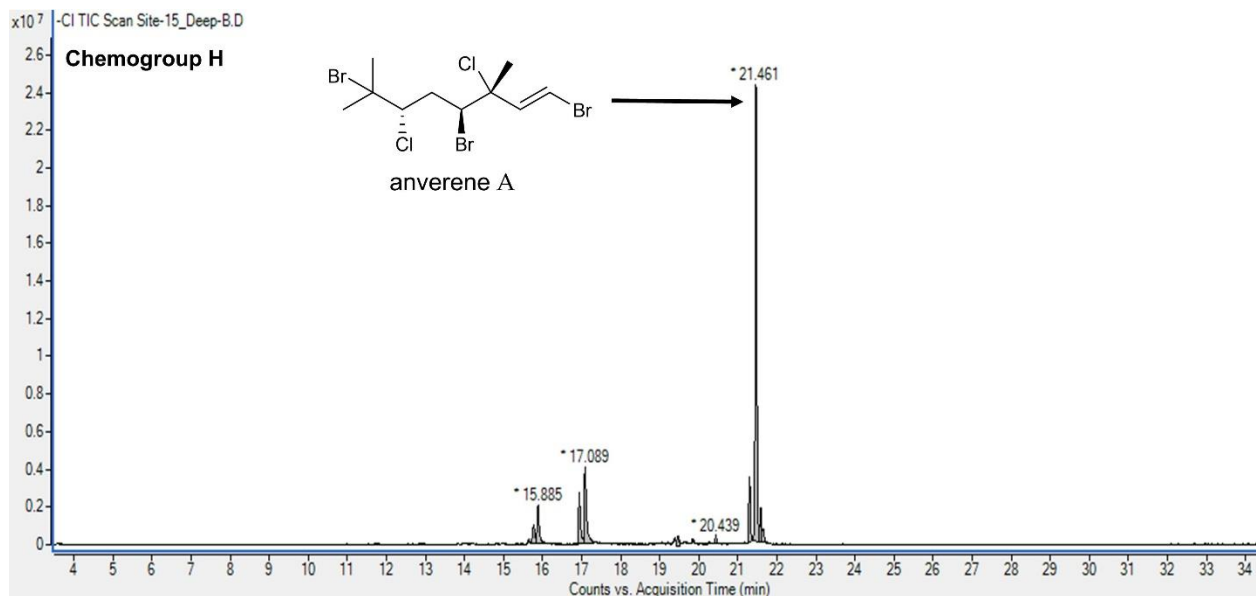

**Figure S4.** GC/MS (NCI) identification of major components of chemogroup H.

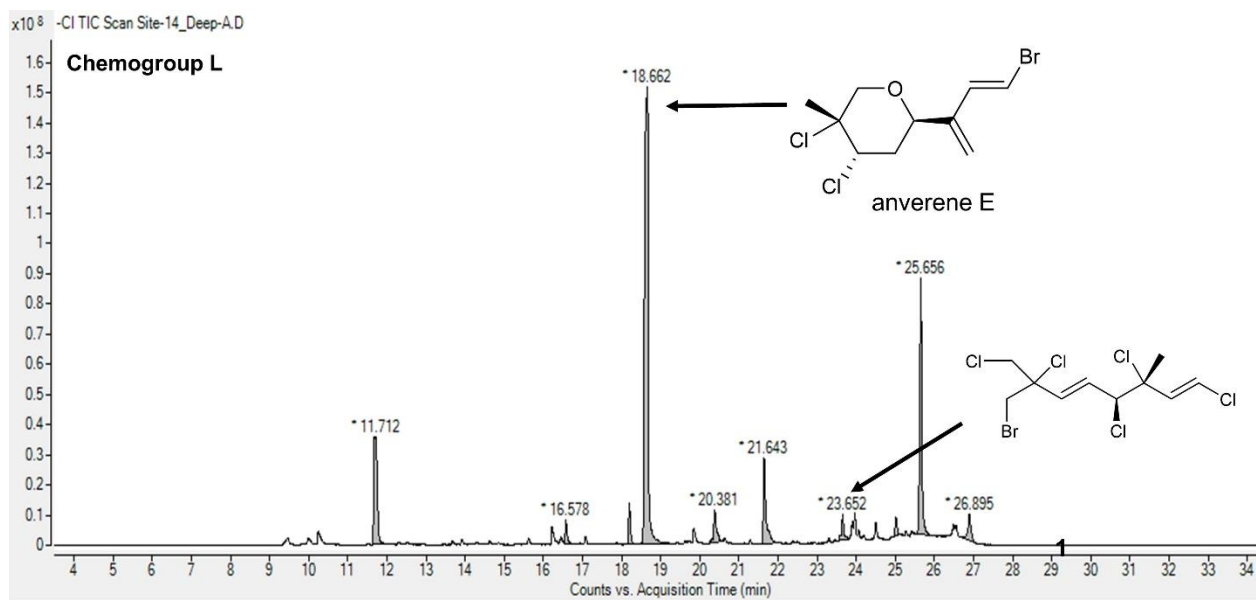

**Figure S5.** GC/MS (NCI) identification of major components of chemogroup L.
